# Supplementary material for: Meta-Transcriptomic Analysis Reveals Novel RNA Viruses in Hippocampus erectus
Source: MDPI journal article supplement (doi:10.3390/v15030772), 2023-03-17
Supplement: s1 [file s1]

**Table S2** Primers used for amplification and sequencing of the HeAstV1.

| Primer   | Sequence 5'-3'          | Position 5'-3' (nt) |
|----------|-------------------------|---------------------|
| HeA-1F   | CGGAGCTAACCGCAGATGT     | 3-21                |
| HeA-1R   | TGTTGCCCAAATCCTCAGGG    | 500-481             |
| HeA-2F-O | ACATCATACGTGCTTCCCGA    | 287-306             |
| HeA-2R-O | GGCAATGCTCTTACCGACCT    | 1000-981            |
| HeA-2F-I | AATTGGCTTCTTTAAGGACAGGT | 306-328             |
| HeA-2R-I | CAGCAGACAAATGCCGTCAC    | 955-936             |
| HeA-3F   | TGACAGTGGTTGTCGTATTGAGA | 853-875             |
| HeA-3R   | CAAAGGCCAAAAGTGGCGTCC   | 1391-1372           |
| HeA-4F-O | AGGCTTTGATCCGACCAGTG    | 1156-1175           |
| HeA-4R-O | ATCATGATCGAGGACGTGGC    | 1870-1851           |
| HeA-4F-I | TTGCGGTTGCCCTTCACTAT    | 1197-1216           |
| HeA-4R-I | TGGTGATCAACTTTCCGCGA    | 1847-1828           |
| HeA-5F-O | GTGTGCCTAGCGCCATTTTT    | 1710-1729           |
| HeA-5R-O | AGCAAGTTCGTCTCGCTTCA    | 2356-2337           |
| HeA-5F-I | GTCATACCGTGTGTCCCCTT    | 1753-1772           |
| HeA-5R-I | CTTCCTTGGTGGCTTTGTCTG   | 2333-2314           |
| HeA-6F-O | CCAAGAAGGGATACGCTGGG    | 2013-2032           |
| HeA-6R-O | TCGTCACTGGCTACATCTTCG   | 2730-2710           |
| HeA-6F-I | GGGACCTACTGTAACGCCAG    | 2030-2049           |
| HeA-6R-I | ATCGTTTGTGACGAGGTGG     | 2693-2674           |
| HeA-7F   | ACTTCAGAGTCCGCAGACCA    | 2580-2599           |
| HeA-7R   | GAGTGCGTTGGCTTGTTGTA    | 3055-3036           |
| HeA-8F-O | AACATGAGGCAGATAGGCGT    | 2976-2995           |
| HeA-8R-O | TGCTGCCGGGGTTTTCTTTA    | 3716-3697           |
| HeA-8F-I | GAGGCAGATAGGCGTCAAAT    | 2981-3000           |
| HeA-8R-I | GCAGTTTTTATCACCCACGC    | 3685-3666           |
| HeA-9F-O | GCATTGTGGCGAACCTACAC    | 3529-3548           |

---

|           |                       |           |
|-----------|-----------------------|-----------|
| HeA-9R-O  | AGACCTTGGTCTTCCAGCAG  | 4268-4249 |
| HeA-9F-I  | TTGTGGCGAACCTACACCAG  | 3532-3551 |
| HeA-9R-I  | TCCAGCAGATCCTTTTCGGT  | 4256-4237 |
| HeA-10F   | CTACCAGCTAGCCCTTGACAC | 4107-4127 |
| HeA-10R   | ACCAATCGAGGAGGACTTCG  | 4687-4668 |
| HeA-11F-O | GGCTACCCGAAAAAGCAGAA  | 4210-4229 |
| HeA-11R-O | GTACGAATGTCTTCTCGGCG  | 4948-4929 |
| HeA-11F-I | GGCTACCCGAAAAAGCAGAAG | 4210-4230 |
| HeA-11R-I | CCGGTCGTCACCGTAACATA  | 4914-4895 |
| HeA-12F-O | GTTAACACCTGCCTCGTTGC  | 4798-4817 |
| HeA-12R-O | TGTCGTCAGGTATCGCACTG  | 5482-5463 |
| HeA-12F-I | TGCCTACGAAACGTCTTGCT  | 4815-4834 |
| HeA-12R-I | CGTCAGGTATCGCACTGTGT  | 5479-5460 |
| HeA-13F   | GAGTACCGCGACTACGTGTT  | 5245-5264 |
| HeA-13R   | TCTGGAAAGCGCCATAAGCA  | 6250-6231 |
| HeA-14F   | TTACCATCCGAACCACCGAT  | 6086-6105 |
| HeA-14R   | TTTCGAGGACGATTCCCACC  | 6990-6971 |
| HeA-15F   | TCTGAATGAGGGCAACGTCC  | 6132-6151 |
| HeA-15R   | TCGAGGTAACGTGTGTACATT | 7084-7064 |

---
